# Supplementary material
Source: MDPI journal article supplement (https://www.mdpi.com/2073-4395/10/2/295)
Supplement: s1 [file s1]

**Table S2:** *Arabidopsis thaliana* (Ath), *Amborella trichopoda* (Am), *Selaginella moellendorffii* (Se), *Chlamydomonas reinhardtii* (Cre), *Chlorella variabilis* (Cva), *Coccomyxa subellipsoidea* (Csu), *Dunaliella salina* (Dsa) and *Volvox carteri* (Vca) sequences used for the design of the figure 1 and/or 2 sequence tree including their sequence identifier (Seq ID) followed by the sequence names (Name).

| Seq ID    | Name              | Seq ID                                            | Name        |
|-----------|-------------------|---------------------------------------------------|-------------|
| AT3g01090 | AthSnRK1.1/AKIN10 | Cre08.g384250.t1.2                                | CreCKIN2.15 |
| AT3g29160 | AthSnRK1.2/AKIN11 | Cre17.g707650.t1.1                                | CreCKIN2.12 |
| AT5g39440 | AthSnRK1.3        | Cre07.g329850.t1.1                                | CreCKIN2.16 |
| AT5g08590 | AthSnRK2.1        | jgi ChlNC64A_1 57611 estExt_fgenes3_pg.C_80094    | CvaCKIN2.1  |
| AT3g50500 | AthSnRK2.2        | jgi ChlNC64A_1 33664 estExt_Genewise1Plus.C_10631 | CvaCKIN2.3  |
| AT5g66880 | AthSnRK2.3        | jgi ChlNC64A_1 34706 estExt_Genewise1Plus.C_50310 | CvaCKIN2.4  |
| AT1G10940 | AthSnRK2.4        | jgi ChlNC64A_1 57249 estExt_fgenes3_pg.C_50159    | CvaCKIN2.5  |
| AT5G63650 | AthSnRK2.5        | jgi ChlNC64A_1 135543 IGS.gm_14_00076             | CvaCKIN2.6  |
| AT4g33950 | AthSnRK2.6        | jgi ChlNC64A_1 138144 IGS.gm_2_00611              | CvaCKIN2.8  |
| AT4g40010 | AthSnRK2.7        | jgi ChlNC64A_1 138887 IGS.gm_22_00128             | CvaCKIN2.9  |
| AT1G78290 | AthSnRK2.8        | jgi ChlNC64A_1 140361 IGS.gm_3_00100              | CvaCKIN2.10 |
| AT2g23030 | AthSnRK2.9        | jgi ChlNC64A_1 142950 IGS.gm_5_00279              | CvaCKIN2.11 |
| AT1g60940 | AthSnRK2.10       | jgi ChlNC64A_1 143933 IGS.gm_6_00507              | CvaCKIN2.12 |
| AT5g01810 | AthSnRK3.1        | jgi ChlNC64A_1 145069 IGS.gm_8_00397              | CvaCKIN2.13 |
| AT5g07070 | AthSnRK3.2        | jgi ChlNC64A_1 140646 IGS.gm_3_00385              | CvaCKIN2.14 |
| AT4g14580 | AthSnRK3.3        | e_gw1.10.111.1 16775                              | CsuCKIN1    |
| AT5g57630 | AthSnRK3.4        | e_gw1.3.241.1 12786                               | CsuCKIN2.2  |
| AT5g45810 | AthSnRK3.5        | estExt_fgenes1_pg.C_100215 47867                  | CsuCKIN2.3  |
| AT5g45820 | AthSnRK3.6        | estExt_fgenes1_pg.C_240007 49286                  | CsuCKIN2.4  |
| AT2g34180 | AthSnRK3.7        | estExt_fgenes1_pm.C_150088 54361                  | CsuCKIN2.5  |
| AT5g58380 | AthSnRK3.8        | estExt_Genemark1.C_30088 64800                    | CsuCKIN2.6  |
| AT4g18700 | AthSnRK3.9        | estExt_Genemark1.C_30287 64904                    | CsuCKIN2.7  |
| AT3g23000 | AthSnRK3.10       | estExt_Genemark1.C_90162 66347                    | CsuCKIN2.8  |
| AT5g35410 | AthSnRK3.11       | estExt_Genemark1.C_240049 68309                   | CsuCKIN2.9  |
| AT1g01140 | AthSnRK3.12       | estExt_Genewise1.C_100280 24306                   | CsuCKIN2.10 |
| AT4g24400 | AthSnRK3.13       | estExt_Genewise1.C_190274 25912                   | CsuCKIN2.11 |
| AT4g30960 | AthSnRK3.14       | estExt_Genewise1Plus.C_30441 27599                | CsuCKIN2.12 |
| AT5g01820 | AthSnRK3.15       | estExt_Genewise1Plus.C_30509 27636                | CsuCKIN2.13 |
| AT3g17510 | AthSnRK3.16       | estExt_Genewise1Plus.C_30548 27662                | CsuCKIN2.14 |
| AT2g26980 | AthSnRK3.17       | estExt_Genewise1Plus.C_100351 29722               | CsuCKIN2.15 |
| AT2g25090 | AthSnRK3.18       | estExt_Genewise1Plus.C_100354 29725               | CsuCKIN2.16 |
| AT2g38490 | AthSnRK3.19       | fgenes1_pg.20_#_52 44853                          | CsuCKIN2.17 |
| AT1g29230 | AthSnRK3.20       | e_gw1.5.212.1 14400                               | CsuCKIN2.18 |
| AT1g48260 | AthSnRK3.21       | Dusal.0281s00020 Dusal.0281s00020.1               | DsaCKIN1    |
| AT2g30360 | AthSnRK3.22       | Dusal.0029s00005 Dusal.0029s00005.1               | DsaCKIN2.2  |
| AT1g30270 | AthSnRK3.23       | Dusal.0056s00014 Dusal.0056s00014.1               | DsaCKIN2.3  |
| AT5g10930 | AthSnRK3.24       | Dusal.0106s00018 Dusal.0106s00018.1               | DsaCKIN2.5  |
| AT5g25110 | AthSnRK3.25       | Dusal.0181s00032 Dusal.0181s00032.1               | DsaCKIN2.6  |
| ERN08591  | AmSnRK2(I)        | Dusal.0186s00019 Dusal.0186s00019.1               | DsaCKIN2.7  |
| ERN01074  | AmSnRK2(II)       | Dusal.0617s00007 Dusal.0617s00007.1               | DsaCKIN2.8  |
| ERN14422  | AmSnRK2(III)      | Dusal.0826s00006 Dusal.0826s00006.1               | DsaCKIN2.9  |
| OST2-1    | SeOST2.1          | fgenes1_pm.C_Chrr_6000070 12650                   | OluCKIN1    |
| OST1-1    | SeOST1.1          | eugene.0100010317 28923                           | OluCKIN2.2  |
| OST3-1    | SeOST3.1          | ost_03_006_039 86646                              | OluCKIN2.3  |

|                    |             |                                   |             |
|--------------------|-------------|-----------------------------------|-------------|
| Cre04.g211600.t1.1 | CreCKIN1    | Vocar.0025s0127.1                 | VcaCKIN1    |
| Cre13.g570250.t1.1 | CreCKIN1L   | Vocar.0048s0006 Vocar.0048s0006.1 | VcaCKIN2.2  |
| Cre02.g075850.t1.1 | CreCKIN2.1  | Vocar.0027s0049 Vocar.0027s0049.1 | VcaCKIN2.3  |
| Cre12.g499500.t1.1 | CreCKIN2.2  | Vocar.0031s0053 Vocar.0031s0053.1 | VcaCKIN2.5  |
| Cre02.g075900.t1.1 | CreCKIN2.3  | Vocar.0004s0065 Vocar.0004s0065.1 | VcaCKIN2.6  |
| Cre11.g477000.t1.2 | CreCKIN2.4  | Vocar.0021s0079 Vocar.0021s0079.1 | VcaCKIN2.7  |
| Cre03.g209505.t1.1 | CreCKIN2.5  | Vocar.0029s0126 Vocar.0029s0126.1 | VcaCKIN2.8  |
| Cre11.g481000.t1.2 | CreCKIN2.6  | Vocar.0013s0156 Vocar.0013s0156.1 | VcaCKIN2.9  |
| Cre06.g292700.t1.2 | CreCKIN2.7  | Vocar.0024s0254 Vocar.0024s0254.1 | VcaCKIN2.10 |
| Cre10.g466350.t1.1 | CreCKIN2.8  | Vocar.0006s0284 Vocar.0006s0284.1 | VcaCKIN2.11 |
| Cre13.g568050.t1.3 | CreCKIN2.14 | Vocar.0001s0337.1                 | VcaCKIN2.12 |
| Cre16.g657350.t1.2 | CreCKIN2.9  | Vocar.0001s1516 Vocar.0001s1516.1 | VcaCKIN2.13 |
| Cre17.g707800.t1.2 | CreCKIN2.10 | Vocar.0001s1602 Vocar.0001s1602.1 | VcaCKIN2.14 |
| Cre12.g485600.t1.2 | CreCKIN2.13 | Vocar.0001s1603 Vocar.0001s1603.1 | VcaCKIN2.15 |
| Cre02.g076000.t1.2 | CreCKIN2.11 | Vocar.0001s1604 Vocar.0001s1604.1 | VcaCKIN2.16 |

---
