# Supplementary material
Source: MDPI journal article supplement (https://www.mdpi.com/2073-4395/10/2/295)
Supplement: s1 [file s1]

**Table S1:** *P. pinaster* PpiSnRK sequence names, clusters, protein and domain identifiers (ID). SnRK clusters according to sequence similarity and protein domain layout (PpiSnRK1: containing the Ser/Thr kinase PTHR24343, IPR015940 and IPR001772 domains; S1R: regulatory subunits of SnRK1 with PTHR13780, IPR032640, IPR000644 and IPR006828 domains; PpiSnRK2: containing the Ser/Thr kinase PTHR24343, PTHR24343:SF387, PTHR24343:SF160, PTHR24343:SF374 or PTHR24343:SF401 domains; and PpiSnRK3: containing the Ser/Thr kinase PTHR24343:SF123 or PTHR43895 and their respective subgroups SF11, SF83, SF67, SF3 and SF61. PpiSnRK1L was an exception, containing the MAP/microtubule affinity-regulating kinase PTHR24346 domain).

| Sequence name              | Sequence cluster    | Protein ID                                                             | Domain ID                                              |
|----------------------------|---------------------|------------------------------------------------------------------------|--------------------------------------------------------|
| PpiSnRK1                   | PpiSnRK1            | PPI00063267                                                            | PTHR24343<br>PTHR24343:SF406<br>IPR015940<br>IPR001772 |
| PpiSnRK1L                  |                     | PPI00037946                                                            | PTHR24346                                              |
| PpiSnRK $\gamma$ 1         | PpiSnRK1-regulatory | PPI00072908                                                            | PTHR13780<br>IPR000644                                 |
| PpiSnRK $\gamma$ 2         |                     | PPI00057630                                                            |                                                        |
| PpiSnRK $\gamma$ 3         |                     | PPI00037042                                                            |                                                        |
| PpiSnRK $\beta$ 1          |                     | PPI00030437                                                            | IPR014756<br>IPR032640<br>IPR006828                    |
| PpiSnRK $\beta$ 2          |                     | PPI00006263                                                            | IPR006828                                              |
| PpiSnRK $\beta$ $\gamma$ 1 |                     | PPI00070488                                                            | PTHR13780<br>IPR032640<br>IPR000644<br>IPR014756       |
| PpiSnRK $\beta$ $\gamma$ 2 |                     | PPI00011715                                                            |                                                        |
| PpiSnRK2.1                 | PpiSnRK2            | PPI00006643                                                            | PTHR24343<br>PTHR24343:SF387                           |
| PpiSnRK2.2                 |                     | PPI00007852                                                            |                                                        |
| PpiSnRK2.3                 |                     | PPI00074180                                                            |                                                        |
| PpiSnRK2.4.1               |                     | PPI00008769                                                            | PTHR24343<br>PTHR24343:SF160                           |
| PpiSnRK2.4.2               |                     | PPI00055947, unigene20210,<br>isotig30430                              |                                                        |
| PpiSnRK2.5                 |                     | PPI00023625-PPI00030306,<br>isotig64833, unigene103244,<br>isotig74909 | PTHR24343<br>PTHR24343:SF374                           |
| PpiSnRK2.6.1               |                     | PPI00050983                                                            | PTHR24343<br>PTHR24343:SF401                           |
| PpiSnRK2.6.2               |                     | PPI00064801                                                            |                                                        |
| PpiSnRK3.1                 | PpiSnRK3            | PPI00016445                                                            | PTHR24343<br>PTHR24343:SF123<br>IPR004041<br>IPR018451 |
| PpiSnRK3.2                 |                     | PPI00014579                                                            | PTHR43895<br>PTHR43895:SF11<br>IPR004041<br>IPR018451  |
| PpiSnRK3.8.1               |                     | PPI00070492                                                            |                                                        |

|               |                                            |                                                       |
|---------------|--------------------------------------------|-------------------------------------------------------|
| PpiSnRK3.8.2  | PPI00063987, unigene35677,<br>unigene7130  |                                                       |
| PpiSnRK3.8.3  | PPI00035743, unigene140469,<br>unigene7130 |                                                       |
| PpiSnRK3.23   | PPI00014785                                |                                                       |
| PpiSnRK3.25   | PPI00014498                                |                                                       |
| PpiSnRK3.28   | PPI00007336                                |                                                       |
| PpiSnRK3.3    | PPI00012924                                | PTHR43895<br>PTHR43895:SF83<br>IPR004041<br>IPR018451 |
| PpiSnRK3.4    | PPI00012606                                |                                                       |
| PpiSnRK3.5    | PPI00007913                                | PTHR43895<br>PTHR43895:SF67<br>IPR004041<br>IPR018451 |
| PpiSnRK3.6    | PPI00008428                                |                                                       |
| PpiSnRK3.7    | PPI00007793                                |                                                       |
| PpiSnRK3.9    | PPI00072973, isotig92254,<br>unigene8326   | PTHR43895<br>PTHR43895:SF3<br>IPR004041<br>IPR018451  |
| PpiSnRK3.10.1 | PPI00065380                                |                                                       |
| PpiSnRK3.10.2 | PPI00013549                                |                                                       |
| PpiSnRK3.11.1 | PPI00063956                                |                                                       |
| PpiSnRK3.11.2 | PPI00030093                                |                                                       |
| PpiSnRK3.12   | PPI00062314                                |                                                       |
| PpiSnRK3.13   | PPI00059400                                |                                                       |
| PpiSnRK3.14   | PPI00052281, unigene18905                  |                                                       |
| PpiSnRK3.15   | PPI00049382                                |                                                       |
| PpiSnRK3.16   | PPI00044696, unigene16659                  |                                                       |
| PpiSnRK3.17   | PPI00036237                                |                                                       |
| PpiSnRK3.18   | PPI00033895                                |                                                       |
| PpiSnRK3.22   | PPI00015534                                |                                                       |
| PpiSnRK3.24   | PPI00014722                                |                                                       |
| PpiSnRK3.26   | PPI00013408                                |                                                       |
| PpiSnRK3.27   | PPI00008604, isotig30080                   |                                                       |
| PpiSnRK3.20   | PPI00033815                                |                                                       |
| PpiSnRK3.21   | PPI00020942                                | PTHR43895<br>PTHR43895:SF61<br>IPR004041<br>IPR018451 |
| PpiSnRK3.29   | PPI00057797, unigene21916                  | PTHR43895<br>PTHR43895:SF67                           |
| PpiSnRK3.30   | PPI00062610                                | PTHR43895                                             |
| PpiSnRK3.19   | PPI00006569                                |                                                       |
| PpiSnRK3.31   | PPI00059942                                |                                                       |
