# Supplementary material
Source: MDPI journal article supplement (https://www.mdpi.com/2073-4395/10/2/295)
Supplement: s1 [file s1]

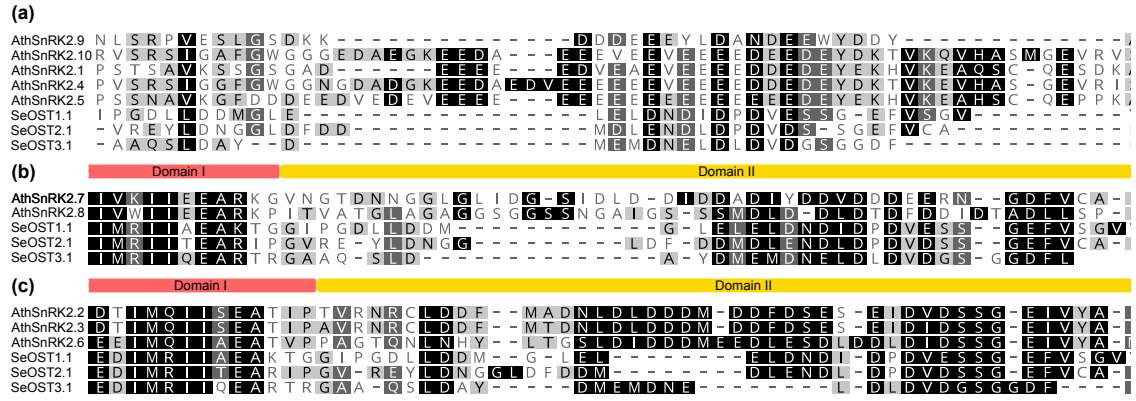

**Figure S1:** M-Coffee alignments of Selaginella and Arabidopsis SnRK2 orthologs focused on the C-terminal region of these kinases containing the regulatory domains I and/or II: (a) group I SnRK2; (b) group II SnRK2; (c) group III SnRK2. Selaginella regulatory sequences showed higher resemblance to the Arabidopsis sequences within the groups II and III.
